# Supplementary material
Source: PubMed Central journal article supplement (PMC4525480)
Supplement: NIHMS612197-supplement-Online_supplement.pdf [file NIHMS612197-supplement-Online_supplement.pdf]

## SUPPLEMENTAL MATERIAL

Intraventricular thrombolysis in intracerebral hemorrhage requiring ventriculostomy: a decade-long real-world experience

**Authors:**

Yogesh Moradiya, MD<sup>1</sup>

Santosh B. Murthy, MD, MPH<sup>1</sup>

David E. Newman-Toker, MD, PhD<sup>2</sup>

Daniel F. Hanley, MD<sup>3</sup>

Wendy C. Ziai, MD, MPH<sup>1</sup>

**Author Affiliations:**

<sup>1</sup>Division of Neurosciences Critical Care, <sup>2</sup>Department of Neurology, <sup>3</sup>Division of Brain Injury Outcomes, Johns Hopkins University School of Medicine, Baltimore, MD, USA.

TABLE I. Discharge outcomes and inpatient complications among specified sub-groups

|                                                                                                           | No IVT<br>% | IVT<br>% | IVT vs No IVT             |                  | IVT vs No IVT           |              |
|-----------------------------------------------------------------------------------------------------------|-------------|----------|---------------------------|------------------|-------------------------|--------------|
|                                                                                                           |             |          | Unadjusted OR<br>(95% CI) | P value          | Adjusted OR<br>(95% CI) | P value      |
| <b>Survival beyond 48 hrs [Total N=31,573, no IVT=30,455 (96.5%), IVT=1,118 (3.5%)]</b>                   |             |          |                           |                  |                         |              |
| Inpatient mortality                                                                                       | 36.9        | 31.4     | 0.784 (0.615-0.999)       | <b>0.049</b>     | 0.743 (0.577-0.957)     | <b>0.021</b> |
| Favorable discharge*                                                                                      | 25.0        | 28.5     | 1.193 (0.895-1.592)       | 0.228            | 1.259 (0.932-1.701)     | 0.133        |
| Unfavorable discharge†                                                                                    | 58.2        | 53.4     | 0.823 (0.633-1.070)       | 0.144            | 0.711 (0.535-0.944)     | <b>0.018</b> |
| Bacterial meningitis                                                                                      | 3.2         | 2.1      | 0.631 (0.249-1.599)       | 0.327            | 0.505 (0.194-1.311)     | 0.160        |
| Ventricular shunting                                                                                      | 8.5         | 11.2     | 1.372 (0.959-1.963)       | 0.082            | 1.304 (0.890-1.911)     | 0.173        |
| Gastrointestinal bleeding                                                                                 | 1.8         | 1.3      | 0.709 (0.255-1.975)       | 0.508            | 0.595 (0.204-1.740)     | 0.343        |
| Tracheostomy                                                                                              | 2.5         | 2.9      | 1.160 (0.504-2.668)       | 0.726            | 1.382 (0.585-3.263)     | 0.460        |
| Gastrostomy                                                                                               | 28.1        | 33.8     | 1.306 (0.981-1.738)       | 0.067            | 1.203 (0.910-1.590)     | 0.194        |
| <b>High ICH case volume hospitals<sup>§</sup> [Total N=23,516, no IVT=22,599 (96.1%), IVT=917 (3.9%)]</b> |             |          |                           |                  |                         |              |
| Inpatient mortality                                                                                       | 41.2        | 32.2     | 0.676 (0.521-0.878)       | <b>0.003</b>     | 0.670 (0.505-0.889)     | <b>0.006</b> |
| Favorable discharge*                                                                                      | 23.7        | 30.2     | 1.390 (1.019-1.896)       | <b>0.037</b>     | 1.497 (1.075-2.086)     | <b>0.017</b> |
| Unfavorable discharge†                                                                                    | 60.7        | 52.8     | 0.725 (0.544-0.967)       | <b>0.028</b>     | 0.610 (0.446-0.835)     | <b>0.002</b> |
| Bacterial meningitis                                                                                      | 3.1         | 2.5      | 0.810 (0.317-2.066)       | 0.657            | 0.701 (0.264-1.864)     | 0.476        |
| Ventricular shunting                                                                                      | 8.4         | 10.8     | 1.328 (0.888-1.985)       | 0.165            | 1.254 (0.823-1.912)     | 0.293        |
| Gastrointestinal bleeding                                                                                 | 1.7         | 1.6      | 0.926 (0.326-2.631)       | 0.885            | 0.815 (0.264-2.513)     | 0.721        |
| Tracheostomy                                                                                              | 2.0         | 3.5      | 1.798 (0.757-4.271)       | 0.177            | 1.755 (0.743-4.150)     | 0.200        |
| Gastrostomy                                                                                               | 26.1        | 34.5     | 1.491 (1.081-2.058)       | <b>0.015</b>     | 1.336 (0.974-1.831)     | 0.072        |
| <b>Obstructive hydrocephalus [Total N=20,990, no IVT=20,189 (96.2%), IVT=801 (3.8%)]</b>                  |             |          |                           |                  |                         |              |
| Inpatient mortality                                                                                       | 39.4        | 27.5     | 0.581 (0.433-0.780)       | <b>&lt;0.001</b> | 0.587 (0.429-0.803)     | <b>0.001</b> |
| Favorable discharge*                                                                                      | 24.5        | 27.1     | 1.145 (0.815-1.610)       | 0.435            | 1.113 (0.771-1.607)     | 0.568        |
| Unfavorable discharge†                                                                                    | 59.5        | 54.3     | 0.809 (0.605-1.082)       | 0.152            | 0.735 (0.521-1.039)     | 0.081        |
| Bacterial meningitis                                                                                      | 3.3         | 2.9      | 0.859 (0.338-2.183)       | 0.749            | 0.698 (0.261-1.867)     | 0.474        |
| Ventricular shunting                                                                                      | 11.2        | 13.2     | 1.203 (0.791-1.830)       | 0.386            | 1.124 (0.716-1.766)     | 0.611        |
| Gastrointestinal bleeding                                                                                 | 1.7         | 1.2      | 0.720 (0.208-2.493)       | 0.602            | 0.544 (0.146-2.022)     | 0.363        |
| Tracheostomy                                                                                              | 2.2         | 3.4      | 1.548 (0.603-3.971)       | 0.359            | 1.794 (0.664-4.847)     | 0.249        |
| Gastrostomy                                                                                               | 26.0        | 37.4     | 1.697 (1.211-2.379)       | <b>0.002</b>     | 1.681 (1.179-2.396)     | <b>0.004</b> |
| <b>Mechanical ventilation &gt;96hrs [Total N=15,435, no IVT=14,773 (95.7%), IVT=662 (4.3%)]</b>           |             |          |                           |                  |                         |              |
| Inpatient mortality                                                                                       | 38.7        | 33.8     | 0.809 (0.576-1.136)       | 0.219            | 0.753 (0.523-1.084)     | 0.127        |
| Favorable discharge*                                                                                      | 19.0        | 20.6     | 1.108 (0.717-1.712)       | 0.643            | 1.131 (0.699-1.832)     | 0.616        |
| Unfavorable discharge†                                                                                    | 61.7        | 60.6     | 0.955 (0.691-1.320)       | 0.781            | 0.842 (0.588-1.204)     | 0.345        |
| Bacterial meningitis                                                                                      | 3.6         | 2.0      | 0.535 (0.137-2.097)       | 0.362            | 0.480 (0.116-1.992)     | 0.312        |
| Ventricular shunting                                                                                      | 8.7         | 14.4     | 1.764 (1.149-2.709)       | <b>0.009</b>     | 1.630 (1.031-2.578)     | <b>0.037</b> |
| Gastrointestinal bleeding                                                                                 | 2.3         | 2.2      | 0.964 (0.343-2.706)       | 0.944            | 0.850 (0.279-2.586)     | 0.774        |
| Tracheostomy                                                                                              | 4.3         | 4.9      | 1.159 (0.493-2.726)       | 0.735            | 1.556 (0.642-3.775)     | 0.328        |
| Gastrostomy                                                                                               | 41.5        | 52.9     | 1.584 (1.149-2.185)       | <b>0.005</b>     | 1.684 (1.188-2.386)     | <b>0.003</b> |
| <b>Transferred in from another hospital [Total N=6,074, no IVT=5,763 (94.9%), IVT=311 (5.1%)]</b>         |             |          |                           |                  |                         |              |
| Inpatient mortality                                                                                       | 39.1        | 30.2     | 0.675 (0.417-1.094)       | 0.108            | 0.727 (0.439-1.204)     | 0.215        |
| Favorable discharge*                                                                                      | 26.5        | 40.0     | 1.850 (1.080-3.170)       | <b>0.023</b>     | 2.159 (1.190-3.918)     | <b>0.011</b> |
| Unfavorable discharge†                                                                                    | 58.1        | 45.8     | 0.611 (0.368-1.014)       | 0.055            | 0.493 (0.270-0.901)     | <b>0.022</b> |
| Bacterial meningitis                                                                                      | 3.4         | 0.0      | N/A <sup>‡</sup>          | 0.174            | N/A <sup>‡</sup>        | 0.143        |
| Ventricular shunting                                                                                      | 9.1         | 11.9     | 1.345 (0.717-2.521)       | 0.353            | 1.146 (0.558-2.353)     | 0.711        |
| Gastrointestinal bleeding                                                                                 | 1.6         | 1.6      | 1.002 (0.173-5.811)       | 0.998            | 0.661 (0.116-3.765)     | 0.641        |
| Tracheostomy                                                                                              | 2.1         | 6.9      | 3.493 (1.047-11.650)      | <b>0.030</b>     | 2.055 (0.456-9.258)     | 0.348        |
| Gastrostomy                                                                                               | 25.7        | 32.1     | 1.368 (0.794-2.355)       | 0.256            | 0.958 (0.596-1.542)     | 0.861        |

\*Favorable discharge is defined as discharge to home/self-care or rehabilitation

†Unfavorable discharge is defined as discharge to skilled nursing facility, hospice or inpatient death

‡Unable to calculate odds ratio due to low number of cases in IVT group

§High case volume hospital defined as case volume quartile 3 or 4 (>47 ICH cases/year)

ICH = intracerebral hemorrhage, IVT = Intraventricular thrombolysis

TABLE II. Resource utilization measures

|                                    | No IVT<br>Median (IQR) | IVT<br>Median (IQR)    | P value* |
|------------------------------------|------------------------|------------------------|----------|
| <b>All cases</b>                   |                        |                        |          |
| Cost of care, USD**                | 42,052 (21,757-71,481) | 58,770 (33,379-88,434) | <0.001   |
| LOS, days                          | 14 (6-25)              | 18 (10-26)             | <0.001   |
| Cost of care per day LOS, USD      | 3,198 (2,380-4,580)    | 3,309 (2,591-4,238)    | 0.285    |
| <b>Withdrawal of care excluded</b> |                        |                        |          |
| Cost of care, USD**                | 43,474 (22,757-73,266) | 59,556 (34,469-88,434) | <0.001   |
| LOS, days                          | 15 (6-25)              | 18 (11-27)             | <0.001   |
| Cost of care per day LOS, USD      | 3,148 (2,344-4,464)    | 3,266 (2,520-4,230)    | 0.270    |

\* Mann-Whitney rank sum test, \*\*inflation-adjusted 2013 value  
 IVT=Intraventricular thrombolysis; LOS=length of stay

TABLE III. Resource utilization stratified by severity indicator (risk of mortality)

|                                        | No IVT                  | IVT                      | P value* |
|----------------------------------------|-------------------------|--------------------------|----------|
| 3M™ APR-DRG risk of mortality subclass | Median (IQR)            | Median (IQR)             |          |
| <b>All Cases</b>                       |                         |                          |          |
| <b>Cost of care, USD**</b>             |                         |                          |          |
| Minor likelihood of dying              | 79,303 (53,526-10,4873) | 108,210 (99,286-117,134) | 0.162    |
| Moderate                               | 80,683 (58,666-113,907) | 71,752 (55,944-102,359)  | 0.562    |
| Major                                  | 38,335 (20,570-65,664)  | 53,540 (32,085-79,789)   | <0.001   |
| Extreme                                | 43,342 (22,518-73,400)  | 58,910 (34,469-88,762)   | <0.001   |
| <b>LOS, days</b>                       |                         |                          |          |
| Minor likelihood of dying              | 28 (18-36)              | 41 (37-45)               | 0.116    |
| Moderate                               | 28 (20-38)              | 25 (21-34)               | 0.468    |
| Major                                  | 14 (6-23)               | 18 (11-26)               | 0.005    |
| Extreme                                | 13 (5-24)               | 17 (8-26)                | 0.002    |
| <b>Cost of care per day LOS, USD</b>   |                         |                          |          |
| Minor likelihood of dying              | 2,734 (2,231-3,758)     | 2,686 (2,206-3,166)      | 0.689    |
| Moderate                               | 2,996 (2,320-3,694)     | 3,198 (2,237-3,755)      | 0.959    |
| Major                                  | 2,993 (2,262-4,265)     | 3,048 (2,332-4,238)      | 0.928    |
| Extreme                                | 3,507 (2,559-5,070)     | 3,667 (3,014-4,448)      | 0.629    |
| <b>Withdrawal of care excluded</b>     |                         |                          |          |
| <b>Cost of care, USD**</b>             |                         |                          |          |
| Minor likelihood of dying              | 81,822 (53,869-106,004) | 108,210 (99,286-117,134) | 0.166    |
| Moderate                               | 82,443 (58,633-115,089) | 90,836 (67,156-110,528)  | 0.859    |
| Major                                  | 39,681 (21,584-66,998)  | 53,991 (32,424-79,792)   | 0.001    |
| Extreme                                | 45,280 (23,845-75,420)  | 59,244 (34,561-88,682)   | <0.001   |
| <b>LOS, days</b>                       |                         |                          |          |
| Minor likelihood of dying              | 29 (18-36)              | 41 (37-45)               | 0.119    |
| Moderate                               | 28 (20-39)              | 25 (21-41)               | 0.517    |
| Major                                  | 15 (7-24)               | 19 (11-26)               | 0.005    |
| Extreme                                | 15 (6-25)               | 17 (9-26)                | 0.017    |
| <b>Cost of care per day LOS, USD</b>   |                         |                          |          |
| Minor likelihood of dying              | 2,752 (2,269-3,758)     | 2,686 (2,206-3,166)      | 0.660    |
| Moderate                               | 2,996 (2,309-3,719)     | 3,264 (2,299-3,859)      | 0.647    |
| Major                                  | 2,978 (2,242-4,246)     | 3,048 (2,336-4,230)      | 0.925    |
| Extreme                                | 3,428 (2,495-4,969)     | 3,649 (2,889-4,338)      | 0.504    |

\* Mann-Whitney rank sum test, \*\*inflation-adjusted 2013 value

APR-DRG=all patient refined diagnosis-related group; IVT=Intraventricular thrombolysis; LOS=length of stay

TABLE IV. 3M™ APR-DRG as a valid predictor of inpatient mortality in primary intracerebral hemorrhage requiring ventriculostomy, NIS 2002-2011

| Predictor variable                            | Outcome: Inpatient mortality |          |                         |          |
|-----------------------------------------------|------------------------------|----------|-------------------------|----------|
|                                               | Unadjusted OR<br>(95% CI)    | P value* | Adjusted OR<br>(95% CI) | P value† |
| <b>3M™ APR-DRG risk of mortality subclass</b> |                              |          |                         |          |
| Minor vs. extreme                             | 0.143 (0.076-0.270)          | <0.0001  | 0.116 (0.064-0.210)     | <0.0001  |
| Moderate vs. extreme                          | 0.168 (0.117-0.241)          | <0.0001  | 0.146 (0.103-0.207)     | <0.0001  |
| Major vs. extreme                             | 0.561 (0.506-0.622)          | <0.0001  | 0.560 (0.508-0.617)     | <0.0001  |

\*Unadjusted logistic regression

†Logistic regression controlling for age, sex, race/ethnicity, inter-institutional transfer, hospital characteristics (location, teaching status, geographic region, bedsize and ICH case volume quartile), modified Charlson comorbidity index, coronary artery disease, diabetes mellitus, hypertension, atrial fibrillation, dyslipidemia, anemia, valvular disease, anticoagulation associated hemorrhage, thrombocytopenia, blood components transfusion, performance of cerebral angiography, craniectomy and craniotomy, prolonged mechanical ventilation, withdrawal of care status and intraventricular thrombolysis.

APR-DRG=all patient refined diagnosis-related group
